# Supplementary material for: Induction of Callogenesis, Organogenesis, and Embryogenesis in Non-Meristematic Explants of Bleeding Heart and Evaluation of Chemical Diversity of Key Metabolites from Callus
Source: PubMed Central journal article supplement (PMC7461564; doi:10.3390/ijms21165826), 2020-08-13
Supplement: ijms-21-05826-s001.pdf [file ijms-21-05826-s001.pdf]

Supplementary Materials:

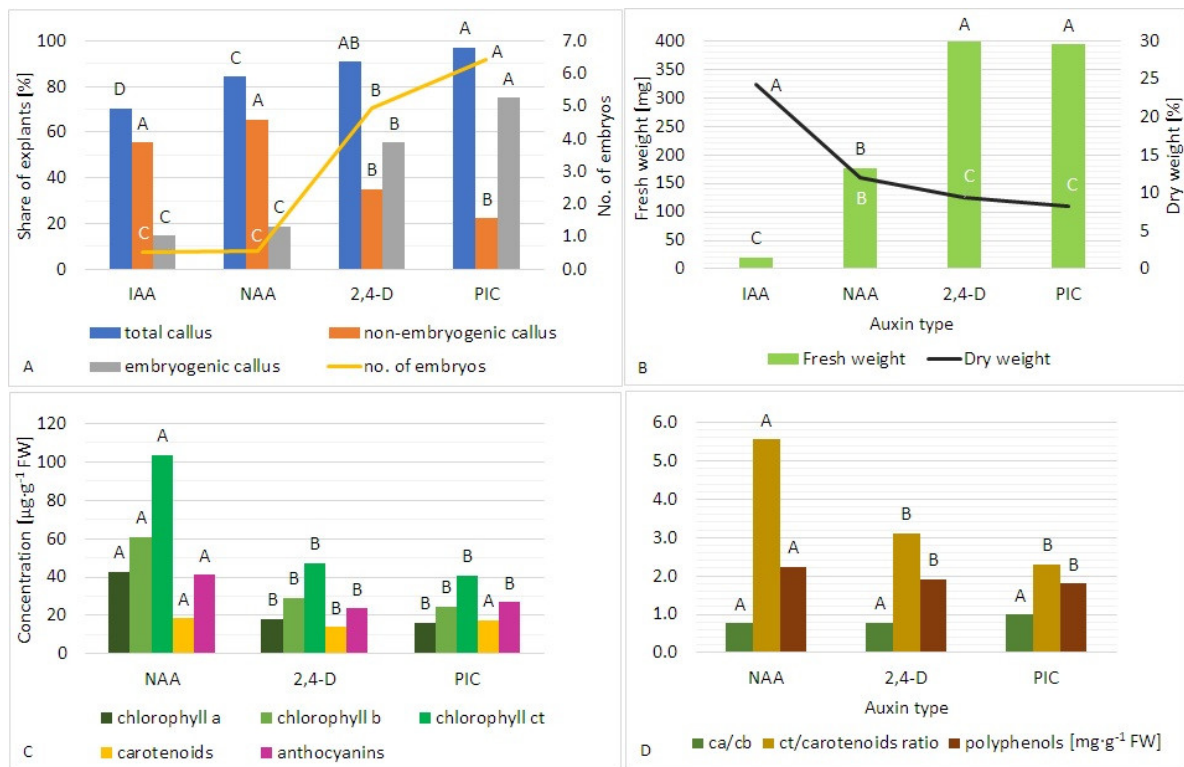

**Figure S1.** Influence of auxin type on the morphogenetic (A,B) and biochemical response (C,D) of bleeding heart explants, irrespective of cytokinin concentration and explant type.
